# Supplementary material
Source: PubMed Central journal article supplement (PMC7058271)
Supplement: jamaoncol-6-676-s003.pdf [file jamaoncol-6-676-s003.pdf]

## Data Sharing Statement

Nanda. Effect of Pembrolizumab Plus Neoadjuvant Chemotherapy on Pathologic Complete Response in Women With Early-Stage Breast Cancer. *JAMA Oncol*. Published February 13, 2020. 10.1001/jamaoncol.2019.6650

### Data

**Data available:** Yes

**Data types:** Deidentified participant data

**How to access data:** Contact [ispyadmin@ispytrials.org](mailto:ispyadmin@ispytrials.org)

**When available:** With publication

### Supporting Documents

**Document types:** None

### Additional Information

**Who can access the data:** Data is available to investigators of approved research proposals.

**Types of analyses:** Biomarker and mechanistic research proposals

**Mechanisms of data availability:** Upon approval of proposal.
